# Supplementary material
Source: publisher figshare collection journal article supplement (https://frontiersin.figshare.com/ndownloader/files/27573809)

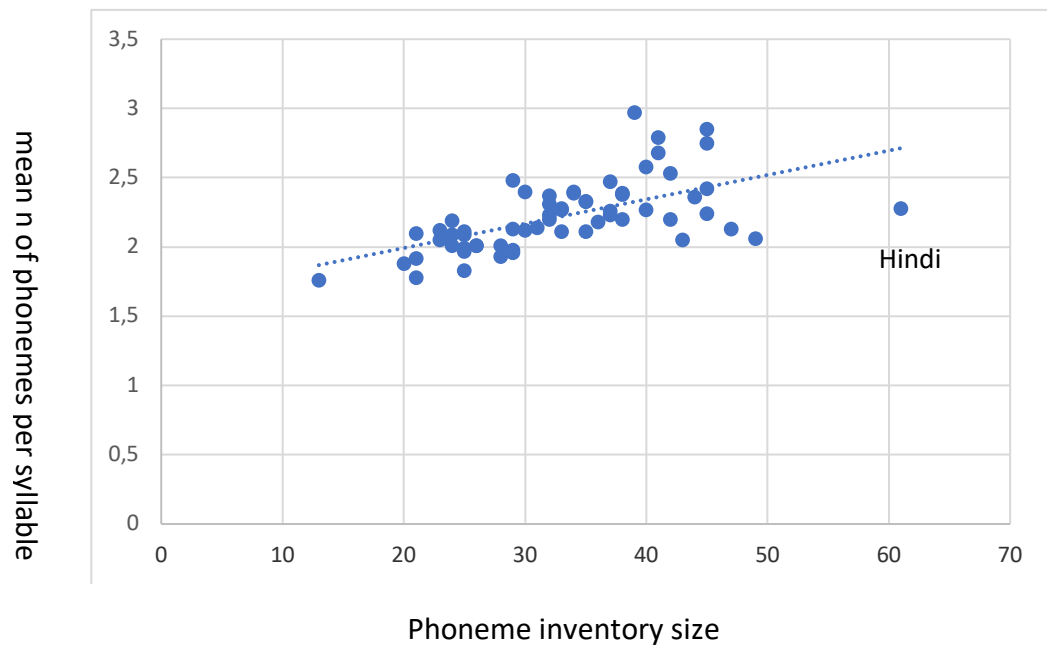

Mean number of phonemes per syllable vs. phoneme inventory size

Supplement: Supplementary file 1 [file 27573809]
